# Supplementary material for: The molecular etiology of deafness and auditory performance in the postlingually deafened cochlear implantees
Source: PubMed Central journal article supplement (PMC7113281; doi:10.1038/s41598-020-62647-y), 2020-04-01
Supplement: 41598_2020_62647_MOESM1_ESM.pdf [file 41598_2020_62647_MOESM1_ESM.pdf]

# **The molecular etiology of deafness and auditory performance in the postlingually deafened cochlear implantees**

Sang-Yeon Lee<sup>1§</sup>, Ye Ji Shim<sup>2§</sup>, Jin-Hee Han<sup>1</sup>, Jae-Jin Song<sup>1</sup>, Ja-Won Koo<sup>1</sup>, Seung Ha Oh<sup>3</sup>,  
Seungmin Lee<sup>1</sup>, Doo-Yi Oh<sup>1</sup>, Byung Yoon Choi<sup>1\*</sup>

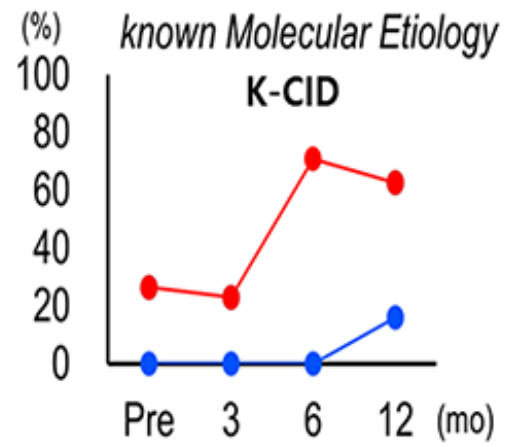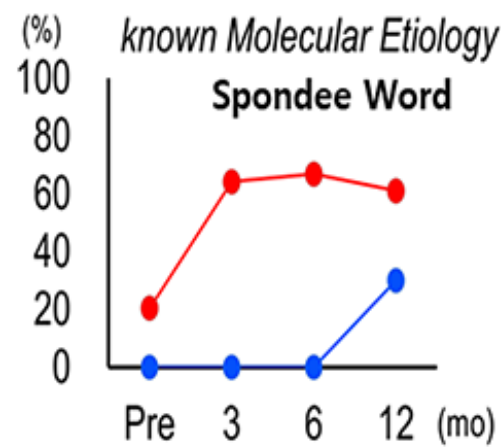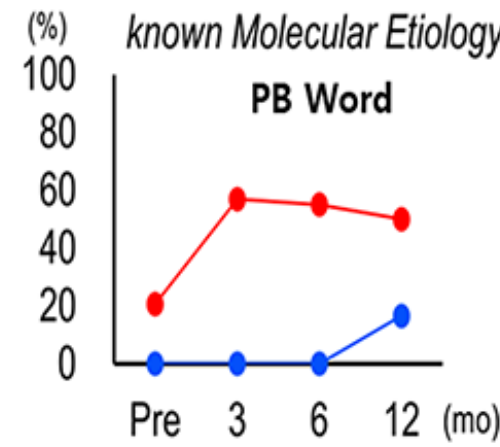

● GD  
(Deaf duration <10yr)

● GD  
(Deaf duration ≥10yr)
