# Supplementary material for: The molecular etiology of deafness and auditory performance in the postlingually deafened cochlear implantees
Source: PubMed Central journal article supplement (PMC7113281; doi:10.1038/s41598-020-62647-y), 2020-04-01

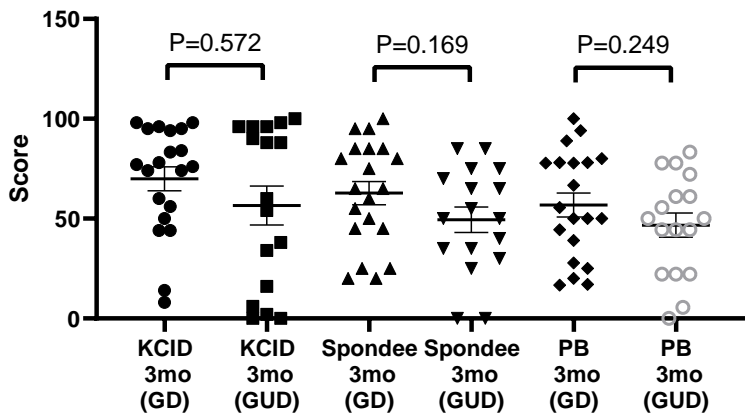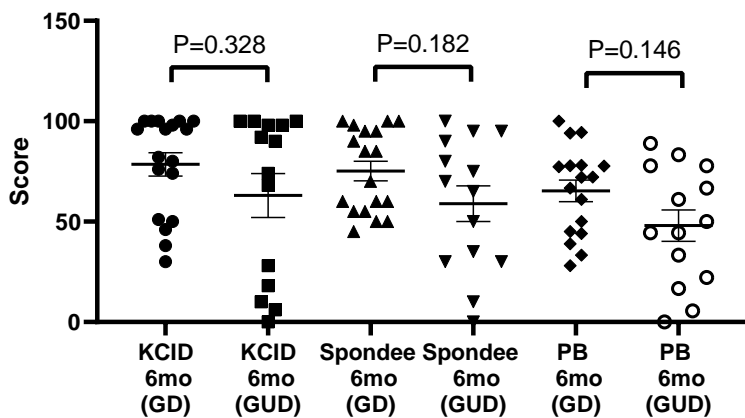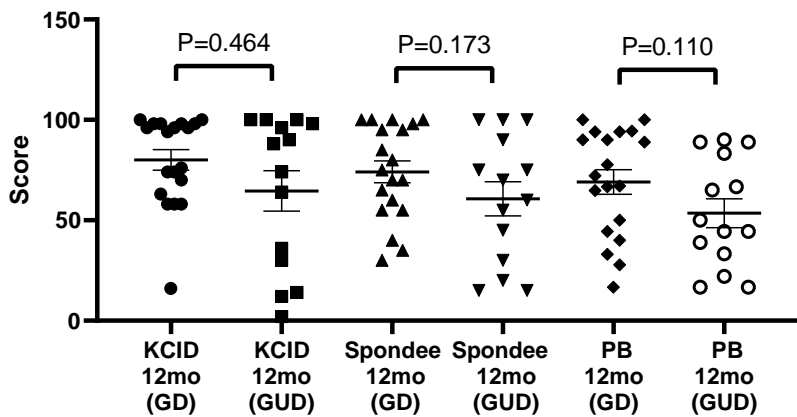

Supplement: 41598_2020_62647_MOESM2_ESM.pdf [file 41598_2020_62647_MOESM2_ESM.pdf]
